# Supplementary material for: Impact of Altitude on the Accuracy of HbA1c in Reflecting Glycemic Status in Patients with Type 2 Diabetes: A Cross-Sectional Study in China
Source: Research Square preprint supplement (doi:10.21203/rs.3.rs-7949373/v1), 2025-10-31
Supplement: Supplementary file 1 [file 053fffe7395703f1126efb84.xlsx]

## Sheet: Sheet1
2022-2024内分泌科科研数据收集表
日期	性别	年龄	年龄改	民族	职业	常住地	遗传病史	是否糖尿病	糖尿病病程（年）	BMI（kg/m^2）	空腹静脉血糖（mmol/L）	餐后2小时静脉血糖(mmol/L)	糖化血红蛋白(%)	糖化血清蛋白(mmol/L)	白蛋白（g/L）	白细胞计数（*10^9/l）	中性粒细胞（*10^9/l）	淋巴细胞（*10^9/l）	红细胞（*10^12/l）	血红蛋白（g/l）	血小板（*10^9/l）	ALT(U/L)	AST(U/L)	尿素（mmol/l）	肌酐（umol/l）	其它疾病诊断	服药情况	联系方式	备注
2022-10-18	2	40	41.8	1	1	13	0	1	2	29	6	5.8	7.6	2.8	40	8.02	4.54	2.2	4.11	122	315	38	32	3.6	52	1	1	18145630348
2022-10-24	2	44	45.8	1	1	13	0	1	1	24.6	8.5	6.4	7.4	2.9	40	6.38	3.85	1.3	4.31	124	205	10	12	3.8	52	0	1	13505244058
2022-10-29	1	39	40.8	1	1	13	0	1	3	29.05	8.7	10.1	8.2	3.3	43	8.64	5.56	1.7	5.3	150	364	35	25	6.3	58	1	2	13587069265
2022-10-30	1	60	61.8	1	1	13	0	1	0.4	23.8	7.4	8.4	5.8	3.4	51	6.39	4.35	1.2	5.39	172	247	22	16	3.7	71	1	0	13758768000
2022-10-31	1	54	55.8	1	1	13	0	1	10	28.68	8.7	10.9	9.4	3.7	43	5.55	2.43	1.4	5.18	153	211	42	17	5.6	59	1	3	13895126666
2022-11-03	1	57	58.8	1	2	13	0	1	7	30.8	5.6	8.2	8.1	4.3	42	5.97	3.35	1.1	4.84	141	197	30	32	4.6	68	1	1	13968696183
2022-11-04	2	58	59.8	1	2	13	0	1	6	24.9	5.7	6.7	6.3	3.5	43	4.76	2.69	1.1	4.31	130	134	19	16	4.2	68	1	2	15858369751
2022-11-07	2	59	60.8	1	7	13	0	1	0.1	29.13	6.4	5.7	9.4	4.3	43	5.47	3.06	1.4	4.84	134	296	19	16	3.1	56	1	0	13917828703
2022-11-07	2	60	61.8	1	2	13	0	1	4	23.55	4.4	5	6.1	2.1	39	5.62	2.45	2.3	4.39	128	225	28	16	6.9	63	1	1	13501921863
2022-11-08	1	47	48.8	1	1	13	0	1	3	30.43	6.3	6.4	6	2.9	50	7.53	4.81	2.1	5.17	152	193	39	17	5.1	71	1	2	15021330891
2022-11-11	2	51	52.8	1	1	13	0	1	1	27.4	6.1	7.1	6.1	2.6	42	6.38	4.2	2.2	4.93	141	186	17	17	5.7	56	1	1	13812153087
2022-11-12	1	53	54.8	1	1	13	0	1	10	27.77	9.2	8	8.8	4.4	42	4.12	2.11	0.9	5.05	163	145	33	22	3.9	66	1	2	13916545106
2022-11-12	1	57	58.8	1	1	13	0	1	0.1	24.4	5.3	13.3	5.8	2.3	43	5.9	2.8	1	5.34	167	183	33	22	4.9	78	1	0	13917876347
2022-11-14	1	58	59.8	1	2	13	0	1	0.1	22.04	5.2	13.1	9.8	6.9	40	8.41	4.9	1.3	5.02	141	255	25	16	8.1	62	1	0	13761079718
2022-11-14	1	60	61.8	1	2	13	0	1	7	26.57	6.7	5.4	8.4	3.2	38	6.77	4.23	1.5	5.42	157	139	38	25	7.3	87	1	2	13671746278
2022-11-17	1	54	55.8	1	1	13	0	1	8	28.9	6.6	5.1	8	3.1	42	6.92	4.25	2.2	4.07	120	225	22	19	4.3	77	1	2	18949695507
2022-11-19	2	30	31.8	1	1	13	0	1	0.1	31.71	13.9	16.4	10.1	4.5	44	5.81	3.38	2.6	4.77	141	209	35	32	5.1	66	1	1	15268442342
2022-11-23	1	35	36.8	1	1	13	0	1	0.1	25.2	4.9	7.9	11.5	6.5	43	4.86	4.55	1.4	4.87	142	239	20	18	4.6	68	0	1	13661891859
2022-11-25	1	47	48.8	1	3	13	0	1	4	28.4	4.8	8.4	7.8	2.4	41	5.04	2.3	2.6	4.77	153	222	31	20	4.2	57	1	1	13815249701
2022-11-25	1	60	61.8	1	2	13	0	1	12	23.3	7	7.7	8.5	4.2	42	4.57	2.45	1.5	4.84	141	211	24	15	7.2	84	1	1	13901827707
2022-11-30	1	50	51.8	1	1	13	0	1	16	27.3	5.2	7.4	6.9	2.9	40	8.27	6.22	1.2	4.3	130	342	23	20	7.9	89	1	3	13857653017
2022-11-30	1	60	61.8	1	2	13	0	1	3	40	6.8	6.3	7.7	3	45	8.73	5.38	1	4.97	143	351	39	24	3.7	53	1	1	13817737571
2022-12-06	1	48	49.8	1	1	13	0	1	10	26.12	8.7	12	8.4	5.2	43	6.96	4.15	2.6	5.09	145	158	15	14	4.2	62	0	2	13636577571
2022-12-09	1	60	61.8	1	2	13	0	1	12	23.88	6.4	12.6	9.9	5.5	40	7.58	4.06	1.1	4.43	132	214	22	18	5.1	75	1	2	13764677719
2022-12-09	1	39	40.8	1	1	13	0	1	3	29.05	8.7	10.1	8.2	3.3	43	8.64	5.56	1.3	5.3	150	364	35	25	6.3	58	0	2	13301972526
2022-12-10	2	44	45.8	1	1	13	0	1	0.1	24.6	8.5	6.4	7.7	2.9	40	6.38	3.8	2.1	4.31	124	209	14	12	3.8	52	1	2	13901907723
2022-12-10	2	57	58.8	1	2	13	0	1	7	19.53	9.6	11.8	7.8	4	45	7.35	4.47	1.4	4.36	122	216	26	25	3.8	61	1	2	13901653953
2022-12-10	1	60	61.8	1	2	13	0	1	12	17.5	7.9	8.8	7.7	4.9	46	6.95	3.35	1.7	4.7	129	296	15	19	5.3	50	0	2	13564288516
2022-12-12	1	56	57.8	1	1	13	0	1	6	26.2	5.5	9.4	6.3	2.4	41	7.24	4.22	3.2	4.95	149	243	16	15	4.4	67	1	1	13501921863
2022-12-13	1	57	58.8	1	1	13	0	1	10	24.6	6.8	11.4	8.4	3.9	43	4.38	2.02	1.2	4.59	134	296	27	18	6	77	1	1	15202199351
2022-12-13	2	56	57.8	1	2	13	0	1	0.1	29.3	9.7	15	11.1	5.3	41	8.18	4.41	1.67	4.67	138	202	40	20	5.6	68	0	0	13402138087
2022-12-13	1	58	59.8	1	1	13	0	1	5	26.9	9.2	13.2	9.8	6.4	46	7.36	4.87	2.41	5.18	155	274	16	15	5.8	71	1	1	13651659807
2022-12-15	2	57	58.8	1	1	13	0	1	7	25.53	9.6	13.5	10.2	5.2	42	7.55	4.89	1.13	4.34	129	135	19	15	8.7	53	1	3	13386174025
2022-12-15	1	53	54.8	1	1	13	0	1	11	24.57	5.7	11.1	6.5	2.4	46	5.94	3.58	2.1	4.56	138	274	20	28	5.2	79	1	3	13801776543
2022-12-15	1	45	46.8	1	1	13	0	1	7	23.71	7	14.8	7.7	4.4	43	7.13	4.45	3	5.12	157	185	19	15	5.4	85	1	3	13901816802
2022-12-17	1	37	38.8	1	1	13	0	1	2	27.5	8.1	7.6	6.8	4.1	49	6.58	4.53	2.28	5.59	165	243	35	27	5.8	75	0	1	13611867395
2022-12-18	2	56	57.8	1	2	13	0	1	14	21.07	5.1	6.8	8.2	3	39	6.02	3.01	1.43	4.76	143	197	15	16	6.6	69	1	1	15821153036
2022-12-20	1	55	56.8	1	2	13	0	1	12	22.86	7.4	7.3	6.2	3.1	42	7.55	5.12	3	5.14	148	213	27	15	8.9	100	1	2	13618230415
2022-12-20	2	60	61.8	1	2	13	0	1	4	24.9	5.2	14.2	6.3	2.9	42	5.64	2.46	1.78	4.78	147	129	27	22	6.5	51	1	2	13817759118
2022-12-20	2	58	59.8	1	2	13	0	1	15	27.3	7.6	11	7.4	3.1	44	8.22	5.5	2.45	4.96	146	276	26	18	3.6	51	1	2	13918586047
2022-12-21	1	41	42.8	1	2	13	0	1	2	21.51	8.7	13.9	9	4.2	41	4.15	2.01	1.34	4.5	140	272	36	17	4.8	61	0	2	15021230050
2022-12-22	2	52	53.8	1	3	13	0	1	0.5	23.44	5.3	7.4	5.6	2.5	40	6.86	3.88	2.12	4.04	127	277	20	16	5.6	56	1	1	15021828047
2022-12-23	1	58	59.8	1	2	13	0	1	11	24.11	5.8	10.3	9.2	4.3	40	7.24	5.08	2.1	5.52	154	154	41	19	6.3	81	1	1	13651792953
2022-12-24	1	45	46.8	1	2	13	0	1	3	26.88	7	6	5.6	3	43	6.1	3.57	3	5.49	155	220	43	19	5.7	73	1	1	18261059888
2022-12-26	1	58	59.8	1	2	13	0	1	10	28.4	5.9	9.2	8.7	4	39	7.25	3.91	2.3	4.91	133	233	27	15	3.8	50	1	1	13801883828
2023-01-17	1	54	55.8	1	2	13	0	1	9	23.5	4.9	11.7	6.4	2.7	46	6.97	4.51	1.7	4.87	154	178	22	16	7.4	70	1	3	18019317562
2023-01-17	2	55	56.8	1	2	13	0	1	14	22.03	6.5	6.4	6.6	2.1	39	4.61	2.77	2	4.89	144	191	33	20	4.9	63	1	2	13052469199
2023-01-17	1	42	43.8	1	1	13	0	1	12	31.63	7.9	12.6	8.4	3	45	7.18	3.45	1.4	4.6	133	192	40	21	6.9	56	1	3	13909794977
2023-01-17	1	45	46.8	1	1	13	0	1	3	26.88	7	6	5.6	3	43	6.1	3.57	3.3	5.49	155	226	43	19	5.7	73	1	1	13921675008
2023-01-18	1	55	56.8	1	1	13	0	1	8	27.17	7.5	13	7.3	2.9	42	5.4	3.54	3	5.24	152	240	34	16	8.9	104	1	2	15241576210
2023-01-19	1	42	43.8	1	1	13	0	1	8	34.6	8.7	11.2	8.1	2.9	42	6.88	4.16	3.2	5.56	156	208	38	37	3.9	61	1	2	13901400971
2023-01-22	2	49	50.8	1	1	13	0	1	7	21.76	6	6.8	7.7	3.5	42	5.87	3.51	1.7	4.04	129	227	42	16	6.7	60	1	2	13852399880
2023-01-23	1	59	60.8	1	2	13	0	1	3	27	6	9.6	8.9	1.5	43	7.84	3.28	3.3	4.43	130	345	28	22	6.2	71	1	1	13974645109
2023-01-24	1	47	48.8	1	1	13	0	1	7	20.94	6.8	8.2	8.5	3.6	44	6.35	3.78	2.5	5.99	167	262	35	19	5.4	70	1	1	13003138893
2023-01-26	1	52	53.8	1	1	13	0	1	7	30.86	6.1	5.7	6.1	2.5	44	5.11	2.33	1.4	4.38	137	185	40	24	7.9	59	1	1	13801712653
2023-01-28	2	52	53.8	1	3	13	0	1	13	23.12	7.1	12	8.7	4.5	40	6.01	2.86	1.8	4.34	122	206	17	14	4.4	60	1	2	13671798379
2023-01-29	2	49	50.8	1	1	13	0	1	3	22.04	7.7	10.7	7.3	2.7	40	8.76	4.83	2.12	4.38	126	262	31	18	4.7	65	1	2	13631597649
2023-02-01	2	53	54.8	1	1	13	0	1	5	26.71	7.8	12.4	9.4	4.6	42	6.83	4.67	2.17	4.99	143	289	23	14	3.6	64	1	2	18921777645
2023-02-01	2	56	57.8	1	2	13	0	1	6	25.39	7.9	12.9	8	3.6	50	6.28	3.76	2.77	4.63	131	272	32	19	4.6	62	1	1	13917266255
2023-02-01	1	45	46.8	1	1	13	0	1	2	30.37	6.7	5.1	10.9	5.2	43	6.71	4.26	2.77	4.85	153	190	24	15	7.9	78	1	2	15800765525
2023-02-01	1	52	53.8	1	1	13	0	1	4	26.85	7.1	8.6	7.7	2.7	43	5.53	2.61	2.49	4.58	140	189	31	18	4.3	66	1	1	13907046801
2023-02-01	1	58	59.8	1	7	13	0	1	5	20.9	6.2	8.3	7.2	3.9	46	4.9	3.01	2.49	4.72	130	147	34	20	4.7	54	1	2	18805618098
2023-02-02	1	57	58.8	1	3	13	0	1	3	24.6	8.6	12.4	8.6	3.1	41	4.32	2.84	2.48	5.12	149	134	15	14	4.4	65	1	1	13767616228
2023-02-03	2	38	39.8	1	1	13	0	1	4	24.22	5.3	8.9	5.3	2.1	46	8.04	6.03	1.74	4.11	129	171	19	17	3.6	64	1	2	13678232694
2023-02-04	1	54	55.8	1	2	13	0	1	7	26.06	6.2	13.3	7.2	2.6	36	7.95	5.33	2.1	4.59	150	198	24	18	6.2	80	1	2	13671866102
2023-02-05	1	53	54.8	1	1	13	0	1	7	23.7	6.4	10.2	7.9	3	43	6.42	5.07	2.7	4.46	135	177	15	17	7.5	103	1	1	13901778629
2023-02-07	2	63	64.8	1	3	13	0	1	4	28.55	8.4	10.5	8	3.75	46	6.74	2.79	3.2	4.74	144	282	34	30	4.4	55	1	1	13816388686
2023-02-09	2	56	57.8	1	2	13	0	1	10	22.19	4.6	5	5.5	2.85	49	5.91	2.57	2.4	4.44	134	357	19	23	4.9	59	1	2	13636336313
2023-02-10	2	59	60.8	1	2	13	0	1	12	34.77	4.4	8.8	7.5	2.57	42	9.42	6.23	3.16	4.86	141	247	23	20	6.6	94	1	3	18916950152
2023-02-10	1	60	61.8	1	2	13	0	1	13	27.18	5.5	12	7.4	2.4	43	4.2	2.18	3.5	5.1	159	106	42	38	6.5	66	1	3	18930416079
2023-02-13	2	55	56.8	1	3	13	0	1	6	20.83	8.11	11.2	11	5.5	41	6.16	3.13	2.5	4.4	128	236	18	14	8.2	84	1	3	13761812603
2023-02-13	2	56	57.8	1	2	13	0	1	15	25.48	8	14	7.5	3.58	43	6.51	3.2	3.14	4.46	131	239	38	19	5.1	62	1	3	13601833388
2023-02-13	2	60	61.8	1	2	13	0	1	17	25.64	6.5	6.9	6.5	2.25	39	5.82	3.44	2.63	5.03	158	103	25	23	7.2	88	1	1	13127580132
2023-02-15	1	58	59.8	1	2	13	0	1	4	23.94	8.6	15.5	9.4	5.19	47	7.12	4.02	3.15	5.19	155	251	19	14	6.4	67	1	3	13701768843
2023-02-17	1	56	57.8	1	2	13	0	1	10	28.72	8.8	7.8	6.9	3.07	42	5.97	2.36	3.07	4.83	144	188	17	14	5.7	77	1	1	13601885620
2023-02-17	1	54	55.8	1	1	13	0	1	10	20.08	8.2	14.6	9.3	6.24	41	4.39	2.52	2.6	4.53	136	122	16	14	7.7	58	1	3	15000011891
2023-02-20	2	43	44.8	1	1	13	0	1	11	26.7	10.5	11.1	8.8	3.85	49	9.75	3.78	2.14	4.77	141	342	33	25	5.1	39	1	3	13654891498
2023-02-21	2	47	48.8	1	1	13	0	1	9	21.23	4.8	5.1	6.3	3	42	8.66	6.17	2.25	4.01	121	185	18	20	3.6	43	1	3	18959360312
2023-02-23	1	54	55.8	1	1	13	0	1	8	28.4	5.9	10.24	7.7	1.82	42	8.85	5.34	3.15	4.07	129	248	22	15	7.8	135	1	3	13901788216
2023-02-23	1	62	63.8	1	2	13	0	1	3	25.9	10	6.2	6.4	2.57	44	5.11	2.98	3.27	4.88	155	146	16	14	5.1	62	1	1	18193615550
2023-02-25	1	54	55.8	1	1	13	0	1	15	19.81	8.6	14	8.5	5.21	39	5.23	3.3	2.52	4.73	145	197	15	14	5.1	79	1	3	13761471612
2023-02-28	2	44	45.8	1	3	13	0	1	3	22.31	9.9	15.6	13.8	8.92	39	5.38	3.08	3.16	4.9	148	251	12	13	6.7	49	1	3	13559605732
2023-03-02	2	58	59.8	1	2	13	0	1	1	22.96	7	11.6	6	1.9	42	9.13	6	1.52	4.27	133	220	18	18	5.5	45	0	0	13916860636
2023-03-02	2	62	63.8	1	2	13	0	1	15	27.91	6.8	6.4	10.5	4.45	38	6.24	3.45	3.4	4.07	121	214	17	16	7.3	107	1	3	15601650197
2023-03-03	1	60	61.8	1	2	13	0	1	5	25.25	8.8	11.5	10.2	4.9	42	9.5	6.03	2.51	4.59	158	251	33	31	6.3	80	1	2	13512167890
2023-03-04	1	65	66.8	1	2	13	0	1	13	26.23	5.1	12	5.9	2.73	39	5.8	3.61	2.14	4.93	145	177	17	16	6.1	102	1	3	15300808108
2023-03-04	1	65	66.8	1	2	13	0	1	12	28.04	6.4	11	7	2.96	43	5.96	3.55	3.17	4.08	125	273	32	21	5.8	40	1	1	15921440264
2023-03-05	2	58	59.8	1	2	13	0	1	7	19.27	5.6	6.4	6.6	2.41	41	5.62	2.4	2.64	4.94	137	333	35	22	6.8	76	1	1	18616522219
2023-03-05	1	62	63.8	1	2	13	0	1	12	22.06	6.3	13.6	10.8	5.76	39	7.37	4.2	2.69	4.21	132	211	23	20	4.5	63	1	3	13611840937
2023-03-06	1	60	61.8	1	2	13	0	1	3	23.39	9.4	10.3	7.5	4.04	41	8.44	5.18	2.5	4	122	179	10	10	5.8	105	1	1	13505631668
2023-03-06	2	64	65.8	1	2	13	0	1	5	32.3	10.6	13.7	10.8	6.2	38	4.89	2.51	3.56	4.23	137	170	18	27	4.6	43	1	1	15618001318
2023-03-07	1	54	55.8	1	1	13	0	1	11	22.86	7.8	10.1	7.5	4.05	40	7.27	4.6	2.85	4.87	147	115	13	15	4.6	72	1	3	18019368869
2023-03-08	1	55	56.8	1	3	13	0	1	10	25.69	6.9	14.4	9.6	4.47	37	5.53	2.55	1.04	4.8	149	172	11	10	5.9	67	1	1	18001778998
2023-03-08	1	60	61.8	1	2	13	0	1	12	25.7	6.1	5.7	8.2	4.2	42	7.89	5.82	1.79	5.16	160	169	26	17	7.9	65	1	1	13817119658
2023-03-09	1	65	66.8	1	2	13	0	1	13	23.23	6.8	10.2	6.8	3.3	45	7.55	4.7	2.58	4.27	128	193	15	18	4.6	53	1	1	13507979866
2023-03-09	1	44	45.8	1	2	13	0	1	10	26.9	5.7	10.8	6.2	3.1	39	5.89	3.42	3.35	5.03	159	160	22	19	6.8	57	1	1	13912727881
2023-03-09	1	60	61.8	1	2	13	0	1	0.9	21.97	4.7	6.4	5.2	2.6	43	4.81	3	2.37	4.16	130	178	12	18	7.2	85	1	1	17132006680
2023-03-12	1	47	48.8	1	1	13	0	1	8	24.22	4.4	8	9.7	3.3	39	6.31	3.63	2.66	4.32	128	248	16	17	6.7	90	1	3	13506850915
2023-03-12	2	60	61.8	1	2	13	0	1	0.1	19.72	8.1	6.5	9.5	5.3	44	5.05	3.03	2.79	4.65	147	197	26	24	3.5	45	1	1	17717023749
2023-03-13	1	40	41.8	1	1	13	0	1	1	26.42	6.8	11.4	8.2	4.3	46	5.45	2.18	2.34	5.02	150	233	24	20	6.2	65	1	3	13816080809
2023-03-14	2	50	51.8	1	6	13	0	1	14	20.08	10.3	11.5	10.2	6.8	40	7.34	2.1	2.39	4.63	131	218	19	15	6.7	41	1	3	13816303560
2023-03-14	1	54	55.8	1	6	13	0	1	10	23.39	6.5	7.9	5.9	2.5	39	4.62	2.38	3.1	4.8	130	218	36	27	6.5	76	1	1	13801776543
2023-03-16	1	58	59.8	1	2	13	0	1	15	23.36	7	9.8	9.6	5.8	39	6.43	4.14	2.46	4.59	142	180	19	21	3.1	68	1	3	13816811911
2023-03-16	1	64	65.8	1	2	13	0	1	10	25.95	10.1	13.4	10.1	6.4	39	6.44	3.23	2.38	4.42	140	211	19	15	6.1	73	1	3	13916849567
2023-03-16	1	55	56.8	1	6	13	0	1	7	26.4	8.4	8	10	6.26	42	6	3.62	2.79	5.06	146	218	19	13	5.2	68	1	1	13701694807
2023-03-18	1	60	61.8	1	6	13	0	1	9	28.37	4.8	7	6	3.3	42	5.63	2.65	1.73	4.8	150	130	11	15	5.8	70	1	1	15800968512
2023-03-18	1	63	64.8	1	5	13	0	1	6	27	8.9	9.1	7.7	4.6	41	7.8	4.43	2.85	4.99	156	246	30	20	5.3	66	1	1	13801964292
2023-03-19	1	49	50.8	1	6	13	0	1	10	24.79	5.6	12.2	6.7	3.6	39	4.76	2.41	3.1	4.58	142	181	17	19	4.1	68	1	3	18961945240
2023-03-19	1	33	34.8	1	1	13	0	1	5	23.6	5.4	12	11.7	6.2	38	4.33	1.91	1.14	4.65	152	242	37	27	4.9	68	1	3	13611625483
2023-03-20	1	39	40.8	1	1	13	0	1	7	34.9	7.2	12.7	7.9	2.6	43	8.15	5.32	2.09	5.19	154	226	34	32	6.6	75	1	2	13701677092
2023-03-20	2	43	44.8	1	5	13	0	1	1.5	17.9	5.3	7.1	5.1	2.8	43	4.79	2.26	1.36	4.91	129	220	10	13	3.1	37	1	3	13965591256
2023-03-20	1	58	59.8	1	6	13	0	1	0.3	25.1	8.5	8.5	7.8	3.9	41	7.39	5.12	1.89	4.98	151	256	20	17	6.6	64	1	3	13801856763
2023-03-23	2	52	53.8	1	7	13	0	1	13	18.75	4.8	14.5	12	7.9	39	4.43	1.96	2.67	4.93	126	215	11	10	6.3	39	1	3	15267862046
2023-03-23	1	51	52.8	1	6	13	0	1	3	25.5	6.4	10.5	8.1	5	43	6.42	2.24	2.06	4.87	150	242	14	10	4.9	69	1	2	13651609188
2023-03-23	1	60	61.8	1	2	13	0	1	10	23.46	6.9	10.9	7.8	4.9	38	8.34	5.04	2.78	4.66	134	185	15	15	5.2	71	1	1	13901936256
2023-03-25	1	57	58.8	1	5	13	0	1	8	22.79	6.8	6.6	6.3	2.8	45	6.34	3.79	2.57	4.99	155	228	42	26	5.6	66	1	3	13801820661
2023-04-01	1	54	55.8	1	5	13	0	1	1	25.6	6.4	7.9	8.7	4.3	39	8.63	5.58	2.61	5.23	135	251	15	14	6.6	84	1	3	13456299888
2023-04-01	1	54	55.8	1	5	13	0	1	11	25.95	10	10.2	7.4	3.3	38	6.44	4.3	2.19	5.16	153	165	15	12	4.5	63	1	3	18699888966
2023-04-03	1	60	61.8	1	2	13	0	1	10	21.56	8	10	7.4	2.3	40	7.14	4.4	1.87	4.72	160	176	33	30	5.8	50	1	2	13701678909
2023-04-05	2	51	52.8	1	3	13	0	1	10	26.7	8.1	12.6	7.9	3.6	40	6.61	4.6	2.41	4.58	135	334	19	14	3.8	41	1	1	13839333536
2023-04-05	1	44	45.8	1	1	13	0	1	8	23.5	9.6	12.9	8.8	5.5	39	4.26	2.4	3.1	4.93	155	209	30	23	4	72	1	1	13651888723
2023-04-06	1	32	33.8	1	1	13	0	1	0.3	29.38	6	6.1	8.2	3.6	44	8.27	4.72	2.37	4.45	134	267	36	20	5.1	63	1	1	13524895301
2023-04-07	1	60	61.8	1	6	13	0	1	0.1	24	8.3	6.8	10.7	6.2	43	8.19	4.36	2.39	5.05	155	239	20	19	6.4	88	1	3	18116290314
2023-04-17	1	60	61.8	1	2	13	0	1	10	24.62	6.7	11.7	7.6	3.4	39	6.23	4.15	1.72	4.32	132	179	21	13	8.4	107	1	3	15968615259
2023-04-23	2	61	62.8	1	3	13	0	1	15	28.7	10.7	13.3	10.4	6	46	6.26	3.42	3.1	4.53	140	213	12	15	8.9	65	1	3	13681769563
2023-04-23	1	60	61.8	1	5	13	0	1	10	27.2	5.2	7.6	8.2	3.8	42	6.81	3.58	2.73	4.71	146	209	14	20	5.9	105	1	3	13901643095
2023-04-24	1	55	56.8	1	5	13	0	1	11	25.44	8.3	7.4	8.4	4.4	42	5.62	4.03	1.99	4.57	138	210	23	17	5.6	68	1	3	13331826113
2023-04-25	1	45	46.8	1	1	13	0	1	10	24	8.2	12.3	8.8	5.4	45	5.85	2.01	2.99	4.7	141	209	34	25	4.9	60	1	3	13501741519
2023-04-27	1	53	54.8	1	5	13	0	1	10	31.56	8.6	13.7	8.1	4.5	38	4.6	2.9	2.89	5.4	160	126	25	17	5.3	73	1	3	13801670296
2023-05-05	1	57	58.8	1	2	13	0	1	12	24.2	6.4	6.9	6.7	3.4	42	5.7	4.11	1.93	4.41	136	164	31	19	6.1	68	1	2	13329110688
2023-05-08	1	49	50.8	1	1	13	0	1	7	26	5.6	8.2	7.1	3.3	38	4.68	2.2	1.49	5.47	135	251	15	15	6.1	53	1	1	17621990522
2023-05-08	2	63	64.8	1	6	13	0	1	14	22.32	5.4	15	9.6	6.3	38	4.99	2.93	2.39	4.31	125	167	16	15	4.9	43	1	2	13901805842
2023-05-10	1	60	61.8	1	2	13	0	1	3	26.12	6.5	8	6.5	3.4	47	4.79	2.84	3.15	4.61	136	286	22	19	5.8	87	1	1	13805394226
2023-05-10	2	41	42.8	1	1	13	0	1	2	28.16	9.5	11.6	8.5	4.5	44	6.76	4.27	3.11	4.61	135	306	17	15	4.2	36	1	3	17717330903
2023-05-12	1	38	39.8	1	1	13	0	1	1	23.4	7.8	12.9	7.4	4.3	42	5.01	2.85	3.09	5.58	162	214	15	14	3.7	67	1	1	13918893266
2023-05-12	2	66	67.8	1	5	13	0	1	2	26.04	6.4	10.6	7.1	3.7	42	5.29	3.01	2.13	4.42	142	219	27	22	5.2	54	1	3	18918890650
2023-07-04	2	26	27.8	1	1	13	0	1	0.3	27.7	7.6	11.3	7.6	3.5	40	8.75	4.83	1.89	4.52	129	215	23	20	5.1	55	1	0	15170352500
2023-07-06	2	56	57.8	1	2	13	0	1	3	25.3	7.3	7.2	7	2.5	42	6.97	3.69	2.55	4.17	136	170	27	25	7.2	70	1	2	13641635587
2023-07-07	1	50	51.8	1	2	13	0	1	12	23.34	7.2	8.1	6.3	3.3	45	9.35	4.6	2.86	5	156	212	27	19	8.5	81	1	1	13166419968
2023-07-09	2	61	62.8	1	2	13	0	1	15	21.4	6.1	7.4	6.1	2.2	45	5.87	3.83	1.62	4.02	129	248	25	21	5.3	53	1	1	13661599958
2023-07-18	1	55	56.8	1	1	13	0	1	10	26.81	7	9	9.2	3.9	41	6.47	3.65	1.94	5.32	147	144	42	31	9	95	1	2	13002137392
2023-07-21	2	52	53.8	1	7	13	0	1	2	31.24	6.5	8.2	6	3.1	40	4.96	3	1.52	4.43	132	156	40	27	8	40	1	1	18720952761
2023-07-24	1	20	21.8	1	1	13	0	1	0.1	24.2	13.7	15.3	11.4	8.1	48	6.67	3.67	2.44	5.85	175	246	31	26	4.8	60	0	0	13921803329
2023-07-24	1	54	55.8	1	2	13	0	1	2	27.77	6.1	8.8	6.1	2.1	45	8.06	5.05	2.18	4.82	145	193	17	16	5.3	86	1	1	15301669771
2023-07-26	1	19	20.8	1	1	13	0	1	2	25.9	6.7	9.1	6.1	2	47	7.2	4.13	2.27	5.62	153	234	60	38	4.9	58	1	3	13816287107
2023-07-26	2	50	51.8	1	7	13	0	1	12	19.98	7.7	15.3	13.9	5.8	43	5.14	2.86	1.86	4.37	125	161	21	20	5.4	60	1	2	13147120323
2023-07-28	1	25	26.8	1	1	13	0	1	1	24.8	6.2	8.8	9.9	3.3	47	7.4	4.32	2.54	4.8	136	220	23	24	5.4	60	1	1	18767524039
2023-08-05	2	43	44.8	1	1	13	0	1	2	30.73	4.9	10.5	6	2.3	45	7.17	4.15	2.35	4.36	125	285	18	17	4	48	0	1	13870938294
2023-08-08	2	69	70.8	1	2	13	0	1	10	26	6.8	7.7	6.6	3	46	7.85	5.67	2.03	4.12	129	203	19	18	6.2	60	1	2	13564151936
2023-08-10	2	66	67.8	1	2	13	0	1	0.1	30.15	8.2	14.1	11.8	4.9	40	6.53	3.47	2.62	3.84	125	202	39	25	7.2	47	1	2	13918142030
2023-08-10	2	44	45.8	1	3	13	0	1	1	25.2	6.9	12.7	7	2.3	44	4.42	2.79	1.12	4.36	121	160	32	30	7.2	72	1	1	17857314629
2023-08-15	2	70	71.8	1	2	13	0	1	10	21.9	9.2	17.9	10.3	8.4	40	5.61	3.32	1.67	3.86	120	146	57	43	7.9	40	1	1	18015661231
2023-08-16	2	45	46.8	1	1	13	0	1	2	23.8	7.9	13.7	6.6	2	43	7.88	4.33	2.4	4.4	140	200	60	32	5.4	57	1	1	13968802921
2023-08-18	1	59	60.8	1	2	13	0	1	22	22	12	12.5	10.8	7.2	42	5.53	3.47	1.53	5.31	162	132	16	16	6.4	50	1	2	13601621738
2023-08-18	1	46	47.8	1	1	13	0	1	7	25.1	8.8	12.06	10.1	8.06	43	7.83	5.31	2.05	5.12	163	271	23	17	6.1	72	1	2	13517031902
2023-08-21	1	51	52.8	1	1	13	0	1	8	24.09	8.8	9.2	12.2	10.1	43	4.82	2.89	1.56	4.71	142	259	22	16	3.8	58	1	1	13918355937
2023-08-22	1	51	52.8	1	1	13	0	1	4	22.99	6.7	9.3	6.1	2.2	45	6	3.89	1.56	5.2	158	199	18	18	5.1	86	0	1	13671989298
2023-08-24	2	65	66.8	1	2	13	0	1	10	23.05	10.9	14.5	10	6.2	41	4.1	2.23	1.3	4.44	127	185	19	16	5	50	1	2	13915080858
2023-08-24	1	48	49.8	1	1	13	0	1	10	27.2	6.3	5.5	6.5	3.06	47	6.34	3.6	2.14	5.06	158	242	29	18	5.6	58	1	1	13621845134
2023-08-28	1	41	42.8	1	1	13	0	1	3	24.42	7.2	7.1	9.6	4.2	43	4.06	2.53	1.83	4.46	135	194	31	19	6.1	60	1	1	18149729853
2023-08-29	2	62	63.8	1	2	13	0	1	8	25.06	7	7.6	8.7	3.2	43	5.82	3.51	1.58	5.08	146	201	36	24	7.4	70	1	2	13917714782
2023-08-29	1	25	26.8	1	1	13	0	1	0.2	36.7	4.6	6.1	5.6	1.6	46	8.49	5.76	2.26	4.59	132	305	16	15	3.5	78	1	1	18554629863
2023-09-01	2	53	54.8	1	7	13	0	1	2	24.13	5.5	8.8	7.2	3.75	45	8.59	5.71	2.1	4	149	316	18	22	7.3	52	0	1	13040730552
2023-09-01	1	47	48.8	1	7	13	0	1	16	25.04	8.7	9.8	9.5	4.1	44	7.1	3.57	1.71	4.83	151	220	38	35	4.7	64	0	1	13910313525
2023-09-01	2	50	51.8	1	1	13	0	1	2	23.03	13.3	6.2	8.2	3.5	40	4.63	2.78	1.34	4	131	255	31	30	4.6	71	1	1	18955109899
2023-09-06	1	63	64.8	1	3	13	0	1	7	23.73	6.3	11.7	11.8	4.9	41	4.04	2.19	1.38	4.64	144	207	19	18	7.5	67	1	1	13918748807
2023-09-06	2	63	64.8	1	2	13	0	1	3	22.58	10.6	7.8	10.4	4.8	40	9.22	5.85	2.34	5.01	144	195	36	32	8.3	72	1	3	13918748807
2023-09-06	1	54	55.8	1	2	13	0	1	2	27.77	6.4	9.7	6	1.8	44	8.78	3.85	2.32	4.94	151	167	20	19	6.9	75	1	1	18957400060
2023-09-06	1	60	61.8	1	2	13	0	1	10	25	6	8.8	6.6	2.3	46	5.21	4.01	1.2	4.34	125	145	26	29	7.6	73	1	2	13501615665
2023-09-06	2	60	61.8	1	2	13	0	1	8	19.4	12.4	9.5	8.9	3.1	42	7.94	4.86	2.66	4.06	125	242	19	16	8.7	52	1	2	13004121122
2023-09-07	2	46	47.8	1	1	13	0	1	0.4	23.44	6.1	9.6	9.1	3.2	42	8.47	5.43	3	4.58	135	272	11	13	5.7	61	0	1	15261352151
2023-09-08	1	61	62.8	1	2	13	0	1	11	24.49	6.07	8.9	5.9	2	43	7.07	4.24	2	4.86	153	176	18	17	4	57	1	3	13801823000
2023-09-08	1	51	52.8	1	2	13	0	1	1	22.99	6.7	9.3	6.1	2.1	45	6	3.89	1.86	5.2	158	199	18	18	3.5	86	1	0	13619899298
2023-09-14	1	63	64.8	1	2	13	0	1	10	25.9	7.6	9.6	8.5	3.2	40	7.58	4.99	1.65	4.59	135	242	16	19	5.4	62	1	2	13916576131
2023-09-22	1	62	63.8	1	2	13	0	1	13	19.2	8.2	8.5	7	3.6	40	7.44	4.76	1.73	4.48	135	248	30	24	7.2	74	1	2	13052234486
2023-09-22	2	58	59.8	1	2	13	0	1	0.3	32.19	8.9	11.3	8.2	2.6	41	5.62	3.04	2.11	4.83	130	144	20	19	4.3	80	1	2	13584878055
2023-09-25	1	63	64.8	1	2	13	0	1	10	22.24	8.6	12.6	8.4	3	42	5.41	3.15	1.38	4.96	158	211	30	22	6.7	78	1	2	15000755397
2023-09-26	2	54	55.8	1	7	13	0	1	8	22.07	5.6	8.7	6.2	2.3	45	9.3	5.77	2.33	5.28	155	235	35	22	5.3	67	1	3	13978457728
2023-09-26	2	58	59.8	1	2	13	0	1	12	22.5	7.9	11.2	10.7	5.6	44	8.62	5.57	2.76	4.47	159	261	22	15	6.3	69	1	2	18817565491
2023-09-28	2	57	58.8	1	2	13	0	1	2	27.68	8.7	11.4	9.4	3.8	42	8.27	4.81	1.42	4.5	125	287	20	13	7.8	85	1	2	15221466356
2023-09-28	1	58	59.8	1	1	13	0	1	1	23.29	7.8	8.7	7.1	2.6	40	6.86	4.19	2.05	5.13	153	214	39	19	5.3	64	1	1	18015075030
2023-09-28	1	57	58.8	1	1	13	0	1	0.6	24.8	6.8	11.8	6.3	2	42	5.51	3.81	1.14	4.72	139	230	27	25	4.6	74	1	3	13774328276
2023-09-29	2	60	61.8	1	2	13	0	1	10	29.3	5.6	7.7	5.6	2.25	40	4.73	3	1.16	4.99	131	223	15	20	8.3	58	1	3	15921358782
2023-09-29	2	59	60.8	1	2	13	0	1	11	21.09	6.9	8	8.2	4.4	46	5.54	2.9	2.29	4.38	132	146	18	20	7.9	52	1	2	18601683088
2023-09-29	1	55	56.8	1	1	13	0	1	10	23.43	7	11.4	11.1	5.6	46	5.67	3.59	1.72	4.54	139	245	20	15	5.7	60	0	1	13671908356
2023-10-01	1	59	60.8	1	2	13	0	1	12	25.2	6.4	11.4	10.1	5.7	47	6.09	3.39	2.18	5.45	161	232	30	22	5.9	60	1	3	13585900990
2023-10-10	1	59	60.8	1	2	13	0	1	8	24.5	6.1	10.4	6.4	2.8	41	4.14	1.97	1.69	4.46	145	159	16	15	7.8	93	1	2	13901915961
2023-10-12	2	55	56.8	1	2	13	0	1	5	20.7	7.4	10.9	7.8	2.4	41	4.97	2.69	3.3	4.98	127	297	17	18	6.1	68	1	2	13162889738
2023-10-13	2	58	59.8	1	2	13	0	1	5	26.62	6.8	9.1	6.6	2.2	42	7.48	4.99	1.8	4.41	128	271	17	16	3.6	43	1	1	13524658054
2023-10-13	2	58	59.8	1	2	13	0	1	8	21.9	6.5	8.5	7.1	2.7	48	7.5	4.62	2.3	4.73	139	252	30	29	5	64	1	2	13501793126
2023-10-17	1	27	28.8	1	1	13	0	1	1	36.7	6.4	7	7.9	2.1	44	4.64	2.56	1.54	5.51	144	266	40	18	3.9	58	1	1	15995458995
2023-10-18	1	56	57.8	1	2	13	0	1	3	23.78	5.4	10.5	7.9	2.2	40	5.66	3.75	1.3	4.72	143	191	18	16	8.4	79	1	2	13651979658
2023-10-18	1	37	38.8	1	1	13	0	1	0.4	28.3	6.5	8.1	9.9	3.5	43	8.06	5.12	1.66	5.69	157	232	35	32	4.3	66	1	1	13512165678
2023-10-18	2	60	61.8	1	2	13	0	1	0.1	35.78	6.2	8.6	6.2	2	46	6.54	4.97	2.89	4.33	125	273	19	15	3.7	59	1	1	13651979595
2023-10-20	1	56	57.8	1	2	13	0	1	12	30.9	8.6	13.2	10.5	5	44	6.76	4.12	1.8	4.64	146	181	31	29	7.6	88	1	2	13512168977
2023-11-01	1	59	60.8	1	1	13	0	1	2	25.4	5.9	8.8	6.4	1.8	44	5.85	3.37	1.5	4.81	146	198	32	24	6.4	81	1	1	13641635807
2023-11-01	1	54	55.8	1	2	13	0	1	5	26.11	8.7	9.8	6.9	2.1	41	5.5	3.59	1.42	5.48	157	232	24	17	7	94	1	1	13970526100
2023-11-01	1	53	54.8	1	1	13	0	1	1	25.76	7.4	11.1	6.9	2	40	5.76	3.77	1.49	5.02	154	165	36	19	8.4	78	1	1	13806256756
2023-11-02	1	59	60.8	1	2	13	0	1	8	24.49	6.6	12.6	7.6	2.4	41	9.1	5.38	1.53	4.72	142	286	40	37	4.7	73	1	1	13916433687
2323-08-09	1	38	39.8	1	1	13	0	1	3	24.1	6.4	7.7	7.6	4.4	42	4.84	2.31	2.04	4.81	147	209	16	15	5.6	66	1	2	13802500235
2023.8.14	1	54	54	1	6	12	0	1	8	25.3	6.19	12.42	5.11	1.6	46	5.94	3.81	1.71	5.58	177	201	21.3	15.2	3.9	79	1	3	13897612212
2023.10.7	2	58	58	1	2	12	0	1	6	22	8.71	13.61	5.19	1.9	46.9	3.57	2.16	1.2	4.52	135	133	25.6	17.6	6.6	55	1	1	13909787434
2023.10.9	1	33	33	1	1	12	1	1	2	26.9	6.56	13.61	5.53	1.9	47.7	8.94	4.31	3.65	5.79	177	285	52.2	19.3	4.8	59	1	1	15957371741
2023.8.26	1	52	52	1	2	12	0	1	0	27.4	5.98	12.06	5.61	1.9	43	7.15	4.56	2.07	5.61	172	191	31.6	17.8	6	94	1	0	13997196633
2023.11.26	2	57	57	1	5	12	0	1	1	22	8.06	9.47	5.87	2.2	46.2	7.24	4.78	1.9	4.84	147	318	28.9	19.7	4.1	67	0	1	18997083523
2023-11-02	1	47	47	1	1	12	0	1	6	21.3	11.65	7.79	10.98	3	40.9	4.98	2.85	1.7	4.86	153	176	18.5	16.6	5.4	65	1	3	17797176827
2023.11.4	2	54	54	1	2	12	0	1	2	23.05	6.22	17.03	6.03	2.16	45.2	5.5	2.57	2.44	4.27	139	157	24.3	15.3	5.8	61	1	1	18897034837
2023.7.21	2	65	65	1	2	12	0	1	2	25.51	7.31	11.53	6.16	2.2	35.7	5.14	2.97	1.7	4.14	121	173	14.7	18.1	4.2	50	1	1	13315278269
2023.11.22	1	56	56	1	3	12	0	1	0	31.1	9.4	17.55	6.16	2.2	47.3	7.81	6.01	1.4	5.02	157	266	36.3	14.5	3.6	68	1	0	13897282677
2023.7.27	1	54	54	1	2	12	0	1	4	32	8.1	13.86	6.28	2.5	42.4	3.4	2.1	0.99	5.68	187	144	22.9	23.1	2	65	1	1	15202586533
2023.8.16	1	52	52	1	1	12	0	1	15	24.1	9.66	12.41	6.39	2.8	47.2	6.91	4.44	1.73	5.09	166	143	30.2	21.7	7.7	71	1	3	18997022388
2023-10-16	2	63	63	1	2	12	0	1	16	26.3	7.22	15.05	7.17	2.32	38.9	7.83	4.52	2.87	5.81	181	186	31.1	25.3	5.2	58	1	3	13709738893
2023.11.13	1	41	41	1	6	12	0	1	0.5	23.7	7.97	15.5	7.08	2.7	55.6	7.67	5.06	1.83	4.74	147	165	17.3	12.6	6.5	67	1	3	13209784861
2023.11.16	2	56	56	1	3	12	0	1	13	21.1	5.56	9.14	7.43	2.8	52	5.27	2.5	2.11	4.84	148	215	14.9	12.4	2.2	55	1	3	18897219515
2023.8.3	2	47	47	1	7	12	0	1	0	30.1	7.88	16.91	7.48	2.4	44.5	4.92	3.11	1.44	4.71	142	159	55.2	41.4	4.1	49	1	1	15009719183
2023-12-02	1	47	47	1	6	12	0	1	5	29	8.79	18.34	7.15	3.3	49.7	5.73	3.52	1.5	5.54	173	153	17	18.1	4.7	94	1	3	15500576569
2023-12-04	1	53	53	1	3	12	0	1	0.4	28.7	6.56	19.7	6.26	2.9	44.5	7.11	3.66	2.59	6.4	189	180	54.5	17.8	9.7	98	1	1	13003609315
2023-12-07	1	45	45	1	1	12	0	1	2	30	6.63	7.53	6.21	2.6	42.8	7.52	4.53	2.38	5.57	166	222	24.8	18.4	4	72	1	3	18997166029
2023-12-12	1	45	45	1	1	12	0	1	4	27.7	13.3	9.4	9.75	3	44.6	5.02	2.52	1.88	6.05	172	190	48.1	28	6	61	1	3	13389785323
2023.7.4	1	62	62	1	2	12	0	1	3	26.57	7.42	14.83	7.44	2.4	45.4	5.59	2.86	2.15	5.64	175	178	36.8	26.5	8	82	1	0	15110954745
2023.7.5	2	62	62	1	3	12	0	1	10	23.62	9.27	14.73	6.84	2.4	37.9	4.7	3.48	0.88	5.07	156	100	34.2	23.4	5	60	1	0	15897013774
2023.7.7	1	55	55	1	3	12	0	1	6	24.38	9.1	19.67	7.53	2.3	40.4	4.63	2.97	1.28	4.74	156	158	21.8	12.5	7.9	68	1	3	15597128116
2023.7.11	1	61	61	1	3	12	0	1	7	23.78	10.37	25.36	9.52	2.7	39.5	6.41	3.76	2.26	5.41	173	163	11.3	13.5	4.2	60	1	1	19897004643
2023.7.12	1	65	65	1	3	12	0	1	4	29.41	9.77	14.92	7.73	2.6	42.7	6.38	4.38	1.39	5.4	161	171	21.8	21.6	7.7	75	1	3	13897353078
2023.7.12	1	65	65	1	3	12	0	1	10	28.4	16.36	22.15	9.52	2.9	48.7	7.47	4.7	2.15	5.85	171	67	45.4	24.8	7.3	67	1	1	13734666961
2023.7.13	1	69	69	2	4	11	0	1	0.2	25.71	5.14	8.9	4.3	1.5	45	3.52	2.6	0.56	4.28	126	104	14.9	15.8	5.39	83	1	1	13897348766
2023.7.14	1	55	55	1	3	12	0	1	1	23.66	14.73	15.55	10.42	2.2	37.2	7.68	4.67	2.25	5.33	163	104	63.1	43	8.4	67	1	0	13897351535
2023.7.17	2	63	63	2	3	11	0	1	8	27.25	11.35	15.6	8	2.2	40	6.25	3.72	2.22	4.17	127	257	17.1	13.3	8.72	59	1	1	18935646133
2023.7.20	1	65	65	1	2	12	0	1	7	27.14	8.93	18.51	6.14	2.3	49.4	8.38	6.3	1.79	5.11	172	141	17.9	22	7.4	64	1	1	13619716006
2023.7.20	2	54	54	1	3	12	0	1	2	25.15	8.96	20.48	8.61	2.3	39.8	5.36	3.25	1.71	4.43	139	103	84.3	38.4	4.8	57	1	1	13897653559
2023.7.21	1	66	66	1	2	12	0	1	6	24.49	6.82	18.98	6.79	2.2	41.7	5.77	3.61	1.43	4.3	126	199	15	19.7	6.9	91	1	1	13315278269
2023.7.21	2	63	63	1	3	12	0	1	4	22.03	11.7	21.35	8.09	2.5	38.5	7.54	4.64	2.41	4.82	148	192	24.2	22.6	7.1	64	1	1	15110940973
2023.11.6	1	60	60	1	6	12	0	1	9	22.4	7.19	10.73	7.59	2.5	45.5	4.76	2.79	1.37	4.54	143	190	17.6	20.4	6.7	60	1	2	15110957719
2023.10.29	2	55	55	1	3	12	0	1	4	29.3	10.75	16.7	8.01	2.3	48	7.85	3.87	3.31	5.9	178	171	34.8	21	5.7	42	1	1	15500785969
2023.7.28	1	68	68	1	2	12	0	1	6	21.63	14.64	21.33	8.84	3.2	38.4	6.25	3.84	1.86	5.79	165	223	21.6	15.2	4.5	76	1	1	15297213127
2023.7.28	2	48	48	1	1	12	0	1	13	17.75	22.38	32.93	7.09	3.1	41.5	8.5	6.57	1.32	4.13	142	247	15.4	14.1	2.9	45	1	3	13997152785
2023.7.29	2	70	70	3	7	12	0	1	0	28.13	6.88	11.43	5.3	1.7	39.9	7.27	5.57	1.24	4.67	146	243	23.6	25.2	5.7	76	1	0	13519780401
2023.9.19	2	52	52	1	3	12	0	1	3	28.7	13.83	12.13	8.35	2.6	46.7	6.11	3.76	1.84	5.02	150	179	41.1	28.6	5.2	51	1	1	15837178660
2023.8.4	2	60	60	1	3	12	0	1	20	27.05	11.28	18.83	7.66	2.38	45.5	6.01	3.49	1.92	4.98	140	175	20.9	17.6	7.3	47	1	3	13897281379
2023.11.25	1	39	39	1	5	12	0	1	4	32	8.04	14.64	8.37	3.4	42.7	7.14	3.94	2.69	5.1	162	160	59.9	42	7.4	61	1	3	13639787521
2023.8.16	1	58	58	1	3	12	0	1	0	26.4	16.54	26.8	11.31	4.3	38.8	5.29	3.06	1.79	4.71	148	180	17.2	14.2	5.9	59	1	0	15003680931
2023.8.18	1	61	61	1	2	12	0	1	9	21.5	12.43	27.18	7.01	2.23	48.3	5.41	2.33	2.1	5.23	170	196	35.6	27.2	9.8	73	1	1	13709796117
2023.8.21	2	51	51	1	3	12	0	1	0	24.6	10.71	19.18	6.55	3	41.4	4	2.72	0.91	4.7	152	146	24.9	25.5	5.5	53	1	0	13109742389
2023.8.22	1	51	51	1	1	12	0	1	5	28.7	11.9	19.52	9.46	3.3	44.9	6.47	4.06	1.84	5.71	176	173	25.8	24	6.7	103	1	1	13997163972
2023.8.26	1	51	51	1	6	12	0	1	0	25.8	16.34	22.34	10.08	3	42.1	6.27	4.27	1.65	5.31	169	165	25	17.7	4.1	55	1	0	15597032698
2023.8.29	2	63	63	1	3	12	0	1	7	22.67	5.69	20.01	6.82	2.4	45.5	10.02	6.16	3.27	5	154	404	12.3	17.6	6.9	66	1	1	15695315553
2023.8.30	1	63	63	1	2	12	0	1	10	21.7	19.23	12.06	11.39	4.1	40.8	8.32	4.74	2.78	4.87	156	139	13.9	13.2	6.9	83	1	0	13139060601
2023.9.1	1	64	64	1	2	12	0	1	5	26.3	7.32	13.25	6.25	2.9	39.7	5.92	4	1.26	4.68	156	105	20.1	16.9	3.2	89	1	0	13209782181
2023.9.1	1	56	56	1	3	12	0	1	4	22.5	9.94	19.79	7.13	2.4	48	7.17	4.23	2.3	5.44	167	118	27.5	20.5	4.3	73	1	3	13997092879
2023.9.14	1	48	48	4	3	12	0	1	4	23	7.85	12.94	6.89	2.2	47.2	5.97	3.84	1.63	5.22	159	211	7	13.5	5.6	61	1	3	13897470562
2023.9.15	1	67	67	1	2	12	0	1	15	23.2	15.21	16.1	7.85	3.3	42.1	6.24	3.93	1.81	4.73	155	118	33.8	19	8.1	69	1	3	15997084492
2023.9.15	1	67	67	1	2	12	0	1	0.25	24.5	7.16	18.22	5.8	2.16	48.7	4.86	2.64	1.47	4.59	149	284	19.8	24.6	5.3	96	1	1	18093844911
2023.9.15	1	52	52	1	7	12	0	1	2	23.1	15.16	22.2	9.23	3.6	51.5	9.57	6.99	2.15	5.86	160	179	16.3	11.5	7.4	81	1	1	18997169100
2023.7.26	1	45	45	1	1	12	0	1	1	30.7	9.47	15.01	8.5	2.75	40.3	7.88	5	2.31	5.15	154	185	22.6	19.1	5.5	75	1	3	13327679157
2023.9.18	2	59	59	1	2	12	0	1	4	30	8.77	19.49	8.11	2.62	42.1	6.92	5.02	1.56	4.7	144	283	31.9	18	10	79	1	3	13195757431
2023.9.19	1	65	65	1	2	12	0	1	13	27.4	4.88	7.36	5.65	1.7	48.5	4.5	2.7	1.23	4.39	130	139	9.4	21.5	4.4	97	1	1	15597679613
2023.9.20	1	54	54	1	2	12	0	1	20	21	11.18	18.3	11.34	3.9	41.3	7.05	3.53	3.02	5.23	168	245	15.3	11.7	5.1	67	1	3	15597399963
2023.9.27	2	61	61	1	2	12	0	1	10	16.9	11.13	18.83	8.26	2.9	47.6	8.33	5.39	2.37	5.28	146	246	26.4	18.4	6.8	45	1	3	13389717877
2023.9.27	1	64	64	1	2	12	0	1	8	24.9	7.72	17.13	6.56	2.6	50.5	10.47	7.41	2.09	5.53	163	243	34.4	32.2	5.3	95	1	3	18109782201
2023.9.28	1	46	46	1	1	12	0	1	4	21.5	21.13	25.38	8.06	2.7	39	7.15	6.29	0.49	5.3	163	112	30.5	35.2	6	78	1	3	15897181607
2023.10.3	1	66	66	1	3	12	0	1	14	23.9	7.27	17.36	6.57	2.5	35.1	5.66	4.02	1.03	6.29	209	173	12.6	13.9	9.3	67	1	3	15003606001
2023.10.4	1	39	39	1	6	12	0	1	7	19.2	3.89	6.47	8.15	2.5	49	6.55	2.79	3.12	4.74	149	205	13.9	15	6.2	56	1	3	17697086886
2023.10.16	2	57	57	1	3	12	0	1	1	21.5	8.41	8.39	8.52	2.5	41.4	5.55	2.41	2.72	4.58	147	324	17.5	20.2	5.2	52	1	1	15110974029
2023.10.8	1	45	45	1	4	12	0	1	6	26	6.76	22.69	6.87	2.5	41.6	7.29	3.91	2.71	5.1	153	147	47.4	24.7	4.8	68	1	3	15209785293
2023.10.8	2	45	45	1	6	12	0	1	6	31.2	18.22	22.4	8.53	3.2	37.2	4.49	2.54	1.52	5.93	115	337	103.8	48.3	2.6	41	1	2	17797086610
2023.9.15	1	29	29	1	7	12	1	1	0.1	26.5	12.34	15.31	8.55	2.9	50.5	6.67	4	2.18	5.6	173	203	34.9	18.6	5.5	67	1	3	18097337441
2023.10.10	2	65	65	1	2	12	0	1	11	23.4	10.32	18.61	7.43	2.9	41.3	3.91	1.77	1.82	4.18	139	154	10.9	15.3	4.5	51	1	1	15597683981
2023.10.16	2	63	63	1	2	12	0	1	16	26.3	7.22	15.05	7.17	2.32	38.9	7.83	4.52	2.87	5.81	181	86	31.1	25.3	5.2	58	1	3	13709738893
2023.10.23	2	65	65	1	2	12	0	1	9	25.4	11.1	21.17	8.13	2.7	49.5	3.9	2.55	1.18	4.44	138	115	56.1	48.9	3.4	50	1	1	17725267674
2023.7.26	1	59	59	1	1	12	0	1	0	24.49	9.1	17.26	9.1	2.25	38.5	4.45	2.44	1.58	5.6	176	161	18	15.5	4.6	65	1	0	18797033107
2023.10.28	2	38	38	1	5	12	0	1	0	24.4	9.1	20.66	9.62	2.5	38.8	9.29	5.54	3.3	5.13	151	294	10.9	8.6	1.8	53	1	2	13997316618
2023.10.30	2	56	56	1	2	12	0	1	7	27.7	14.95	28.46	7.47	2.3	43.4	7.8	5.94	1.63	4.39	134	103	32.6	21.9	6.7	45	1	2	13897619991
2023.11.1	1	62	62	1	2	12	0	1	16	27.7	5.59	16.1	6.5	2.3	37.4	4.77	2.4	2	4.23	133	198	18.8	18.9	5.6	93	1	3	18009783236
2023.11.16	1	45	45	1	3	12	0	1	3	25.4	7.51	14.92	9.13	3.5	48.7	6.05	3.13	2.44	5.47	168	172	21.9	14.5	3.9	64	1	1	13997332582
2023.11.2	1	47	47	1	1	12	0	1	6	21.3	11.65	7.79	10.98	3	40.9	4.98	2.85	1.7	4.86	153	76	18.5	16.6	5.4	65	1	3	17797176827
2023.11.3	1	45	45	1	3	12	0	1	3	25.3	6.65	31.59	10.4	4	44.4	5.57	2.72	2.33	5.21	150	232	15.1	11.9	5.9	60	1	3	13897352273
2023.11.3	2	57	57	1	3	12	0	1	0	23.7	14.33	19.19	11.03	3.4	50.3	5.61	3.12	2.09	5.6	169	203	37.9	19.7	4	45	1	3	13099792766
2023.11.3	1	63	63	1	2	12	0	1	0	25	10.39	22.31	8.93	3	44.9	6.12	5.21	0.44	7.25	220	136	8.3	8.9	4.6	59	1	1	13709749937
2023.11.3	2	63	63	1	2	12	0	1	4	23.2	8.95	18.81	6.99	2.3	47.2	4.3	2.3	1.71	4.36	130	111	66.8	44.9	5.3	45	1	1	13997168080
2022.11.6	1	36	36	1	1	12	0	1	3	30.4	10.07	18.05	7.89	2.6	40.8	4.92	2.31	2.16	5.36	160	165	49.4	38.7	3.2	62	1	3	18997263856
2023.7.23	1	49	49	1	1	12	0	1	5	22.6	6.89	7.86	9.19	2.5	31.7	9.09	7.03	1.47	3.73	123	209	38.2	50	4.9	77	1	2	13195759036
2023.11.7	2	53	53	1	7	12	0	1	14	22.6	3.5	17.84	9.32	3	41.3	7.19	4.4	2.28	5.45	164	287	28.8	25	3.9	48	1	2	18297001815
2023.11.7	1	41	41	1	7	12	0	1	0	26.8	15.87	14.84	12.64	3.5	45	7.99	4.91	2.37	5.28	155	175	18.3	11.5	2.6	59	1	1	13186875373
2023.11.12	2	33	33	1	7	12	0	1	0	19.5	17.08	15.42	10.31	3.6	49.2	5.46	3.05	1.98	4.87	129	245	24.1	17.6	7	45	0	2	14797000720
2023.10.27	1	47	47	1	1	12	1	1	2	24.4	13.37	12.4	9.92	3	48.69	8.25	4.34	3.28	5.55	174	204	43.9	22.3	5	45	1	3	13997201845
2023.11.17	2	66	66	1	2	12	0	1	20	23.8	15.95	22.21	9.13	3.2	37.3	9.72	7.2	1.17	5.23	155	168	31.5	31.3	4.6	97	1	3	18997066818
2023.11.19	2	65	65	1	2	12	0	1	6	28.1	18.76	24.81	10.83	3.3	39.8	5.44	2.9	2.17	4.52	142	116	74.9	49.4	6.4	58	1	3	13007775590
2023.11.2	2	56	56	1	3	12	0	1	5	21.5	10.09	13.15	10.75	3.6	49	7.16	4.27	2.47	5.03	150	264	24.3	17.9	5.2	39	1	3	15597373535
2023.11.23	1	64	64	1	2	12	0	1	3	25.7	12.06	20.79	8.61	2.4	51.9	7.66	4.53	2.56	4.7	168	171	15.4	13	7.3	59	1	3	18797387901
2023.11.25	2	65	65	1	3	12	0	1	20	22	5.58	21.39	8.46	2.2	34	5.73	3.86	1.47	5.15	148	154	13.5	14.7	6.5	82	1	3	18797187579
2023.11.25	2	65	65	1	3	12	0	1	10	19	12.52	25.24	10.39	3.3	50.7	5.75	3.59	1.6	5.09	156	199	27.7	22.8	5.1	45	1	3	19909780584
2023.10.7	1	50	50	1	7	12	0	1	1	27.3	13.85	14.64	10.88	3.3	45	7.28	4.82	1.98	5.16	153	215	22	15.3	6.9	68	1	1	13309722037
2023.11.29	1	60	60	1	2	12	0	1	7	20	6.85	9.71	6.4	2.8	41.9	8.78	5.74	2.13	4.9	148	220	17.1	19.4	6.9	93	1	1	18697113123
2023.01.01	2	67	67	1	3	11	0	1	4	26.9	7.04	7.2	7.6	2.1	39.4	3.94	3.1	1.99	4.1	130	200	9.2	12.3	4.49	62	1	1	15909748759
2023.01.01	1	43	43	1	3	11	1	1	10	17.58	9.61	12	12.8	3.9	38.4	7.38	4.2	2.54	6.1	170	127	23.4	23.1	4.2	32	1	1	13897049539
2023.02.02	1	49	49	2	4	11	0	1	4	21.3	9.71	22.24	11.4	3.1	37.7	2.77	1.51	1.02	4.81	159	91	38.2	25.2	7.77	38	1	1	17697047666
2023.02.03	1	53	53	1	1	11	1	1	5	24.91	8.77	10.2	6.5	1.3	47.5	3.68	2.49	0.87	4.77	160	106	36.9	24.3	4.15	71	1	1	18109771155
2023.02.06	1	50	50	1	3	11	0	1	3	28.41	8.1	10.6	8.8	2.02	45.9	5.71	4.05	1.28	5.3	177	165	30.7	12	12.43	54	0	2	18997340597
2023.02.14	1	49	49	2	3	11	0	1	3	27.14	10.5	25.05	14.6	4.26	44	7.65	5.23	1.77	5.37	159	159	30.8	13.3	4.68	59	1	1	15695341777
2023.02.15	1	49	49	3	1	11	1	1	10	23.53	8.6	9.2	7.8	1.8	50.6	5.24	4	0.84	6.11	199	136	57.8	23.4	7.61	63	1	2	18909746664
2023.03.06	1	52	52	2	5	11	0	1	15	29.37	4.96	8.85	8.2	1.9	41.9	6.44	3.59	2.08	5.96	189	124	129.9	53.8	6.22	58	1	2	13619744777
2023.03.15	2	52	52	2	3	11	0	1	5	29.02	10.8	20.64	11.8	3	41	8.01	5.88	1.54	4.64	139	317	15.5	13.1	7.47	62	0	1	15297048883
2023.03.29	1	52	52	2	4	11	0	1	7	18.6	16.2	21.89	8.5	2	36.3	4.64	2.47	1.73	4.38	134	255	166.9	201.3	6.65	68	1	2	13649772151
2023.04.04	1	63	63	2	3	11	0	1	10	28.91	8.9	13.1	10.6	3	38.7	6.72	5.24	0.98	4.82	156	200	35.4	17.9	4.1	40	1	1	13997440546
2023.04.08	1	62	62	2	2	11	0	1	10	31.02	10.25	15.1	9.3	2.41	37	5.64	3.46	1.54	4.81	152	241	40.9	30.5	6.71	85	1	1	18935648788
2023.04.13	1	51	51	2	4	11	0	1	15	21.3	14.6	20.09	15	4.54	38.2	5.57	3.9	1.27	5.61	168	253	44.1	26	5.35	77	1	1	13299763999
2023.04.17	1	53	53	2	4	11	0	1	0.6	29	8.6	13.3	8.5	1.95	41.9	8.51	5.38	2.44	5.59	180	132	195.4	65	4.22	93	1	1	13299840378
2023.05.19	1	61	61	2	3	11	0	1	2	24.91	7.51	9.8	8.8	2.3	33.9	6.32	3.5	2.21	5.76	165	148	43.2	29.5	6.12	78	1	1	13997346515
2023.05.19	1	60	60	4	2	11	0	1	10	29.07	7.67	9.2	8.4	2.1	46.1	6.63	4.03	1.86	5.56	166	174	32.7	21.4	7.67	62	1	1	13399746722
2023.06.29	1	45	45	2	3	11	0	1	0.2	43.58	10.3	17.3	10.3	2.8	40	5.49	3.73	1.37	6	183	134	105.6	35.1	4.49	48	1	1	15809740111
2023.06.08	2	61	61	1	2	11	0	1	0.1	22.66	5.92	9	5.9	1.2	45.1	4.26	2.88	1.11	3.88	131	100	16.7	20.2	3.68	65	1	1	18709745165
2023.07.13	1	67	67	2	4	11	0	1	0.2	25.71	5.14	8.9	4.3	1.5	42.3	3.52	2.6	0.56	4.28	126	104	14.9	15.8	5.39	83	1	1	13897348766
2023.07.17	2	63	63	2	3	11	0	1	8	27.25	11.35	15.6	8	2.2	42.8	6.25	3.72	2.22	4.17	127	257	17.1	13.3	8.72	59	1	1	18935646133
2023.07.20	1	60	60	2	3	11	0	1	1	25.26	5.45	10.6	9.4	2.2	43.5	6.17	3.05	2.44	4.92	164	152	27.9	22.3	8.88	98	1	1	13897786180
2023.10.07	1	61	61	2	3	11	0	1	10	22.41	9.9	15.22	11.2	2.26	29.9	6.91	5.42	0.74	4.7	145	151	41.3	32.6	4.42	78	1	0	13299745086
2023.10.07	1	69	69	2	2	11	0	1	31	27.15	5.16	8.6	9.3	2.03	41.5	5.32	3.45	1.5	4.79	159	165	44	38.5	7.68	52	1	2	13639143298
2023.10.11	1	56	56	2	2	11	0	1	8	23.77	14.3	20.85	10.5	2.96	40.5	6.47	4.64	1.26	6.49	195	196	44.8	12.1	7.89	79	1	1	13897790916
2023.10.11	1	43	43	4	3	11	0	1	2	30.25	16.3	25.1	12.9	2.38	40.4	4.48	2.56	1.61	5.85	167	142	25	19.3	7.2	74	1	1	13385746371
2023.10.23	1	52	52	2	3	11	0	1	16	25.13	8.2	8.71	9.7	1.62	37.5	7.84	5.51	1.62	5.37	159	173	25.2	12.4	5.68	58	1	1	18009743477
2023.10.18	1	60	60	4	3	11	0	1	0.3	30.86	8.1	11.2	9.3	2.02	43.9	11.24	8.84	1.9	5.5	170	133	23.9	15.9	5.61	57	1	1	13119741400
2023.10.21	1	51	51	2	3	11	0	1	8	19.47	14.9	22.1	10.3	2.54	39.6	4.94	3.57	1.01	4.89	151	184	30.3	28.1	8.17	57	1	1	18935696111
2023.10.21	2	61	61	2	2	11	0	1	14	31.32	7.7	8.9	8.1	1.23	39.2	7.72	5.62	1.7	4.82	146	296	28.8	19.4	5.29	43	1	1	13897790719
2023.10.21	1	64	64	2	2	11	0	1	9	27.55	8.6	10.9	9.7	1.69	39.3	7.34	4.84	1.91	4.98	149	233	16.5	12.1	7.63	89	1	3	18997349699
2023.10.23	1	48	48	4	3	11	0	1	6	25.18	7.5	9.8	9.1	1.6	45.3	8.94	5.44	3.01	5.98	194	125	30.4	18.9	7.35	60	1	1	13619745328
2023.10.27	1	59	59	2	3	11	0	1	14	27.47	18.1	29.6	11.3	2.53	40.3	6.44	4.52	1.49	5.44	165	235	25.9	13.8	11.17	80	1	2	18997447572
2023.10.27	2	58	58	1	3	11	0	1	12	24.56	16.1	16.8	7.3	2.11	38.2	4.87	3.1	1.39	4.79	150	142	15.5	14.6	6.04	57	1	1	13897790951
2023.10.30	2	53	53	1	2	11	0	1	7	25.56	11.8	13.4	6.5	2.15	41	7.51	4.25	2.83	5.48	161	227	33.4	17.2	6.68	60	1	1	15597089654
2023.11.02	2	53	53	1	3	11	0	1	0.1	25.33	18.9	22.9	13	2.52	49.7	6.23	4.15	1.73	5.85	174	264	33.5	14.8	4.78	58	1	1	18097398543
2023.09.28	2	62	62	2	3	11	0	1	2	30.8	4.5	7.9	9.9	1.86	36.3	6.14	6.14	3.26	5.76	210	182	57.1	39	8.37	87	1	1	18797280986
2023.09.18	1	62	62	1	3	11	0	1	3	23.84	13	17.6	15.4	2.45	39.1	6.16	3.62	2.16	5.08	155	162	14.5	11.1	5.64	49	1	3	13389740488
2023.09.26	1	42	42	2	3	11	0	1	0.1	28.34	9	12.4	12.6	2.35	40.7	7.37	5.08	1.74	5.06	148	233	60.5	28.8	5.58	54	1	3	18907706666
2023.09.11	1	54	54	2	1	11	0	1	8	21.22	7.5	9.6	8.1	1.96	49.9	6.54	4.4	1.36	5.9	179	278	25.5	20.8	7.72	57	1	3	18935690228
2023.09.11	2	51	51	4	2	11	0	1	5	24.98	9	13.3	11	2.43	45.6	4.96	2.95	1.76	5.91	175	130	38.7	24.5	8.3	47	1	1	18946886000
2023.09.11	1	56	56	2	3	11	0	1	1	28.05	19.5	20.4	15	2.64	41.6	4.62	2.94	1.25	6.52	191	168	50.5	25.4	5.17	54	1	1	18197388521
2023.09.07	2	64	64	1	3	11	1	1	2	21.64	10.6	12.8	7	1.56	44.5	4.67	3.09	1.37	4.41	138	132	13.2	13.8	5.66	41	1	1	18097049155
2023.09.01	1	62	62	2	3	11	0	1	8	20.44	12.4	14.6	14.4	2.54	41.8	4.29	3.23	0.51	5.22	161	96	17.7	21.6	5.12	58	1	1	15897269813
2023.08.25	1	38	38	2	1	11	0	1	0.1	24.73	16.7	19.3	14.4	2.54	37.4	6.61	4.55	1.58	5.23	159	111	22.6	19.9	6.14	74	1	1	15509786667
2023.08.29	1	51	51	1	1	11	0	1	19	23.15	7.5	8.6	9	1.75	44.8	2.87	1.62	1.01	5.42	164	155	19.9	16.4	4.41	61	1	2	13309740576
2023.08.15	1	65	65	2	3	11	0	1	4	31.64	10.8	11.2	10.7	1.95	37.4	6.91	4.08	2.18	5.27	167	114	40.9	21.5	4.95	59	1	3	18195688905
2023.08.16	2	63	63	1	3	11	0	1	5	20.12	12.2	16.8	13.66	2.35	39.2	6.06	3.51	2.16	4.87	150	168	11.2	13.4	5.55	59	1	3	13639747007
2023.08.11	2	53	53	4	3	11	0	1	13	28.52	14.2	20.2	11.3	2.26	36.4	6.73	4.07	2.19	5.09	151	278	15.2	13.5	5.79	80	1	3	13309748839
2023.08.17	1	57	57	1	1	11	1	1	18	22.84	6.5	8.5	6.7	1.4	46.9	3.94	2.43	1.16	5.64	173	166	25.6	23.1	7.87	77	1	3	13119740899
2023.08.13	1	52	52	2	3	11	0	1	2	28.37	13.2	17.4	8.7	1.65	42	8.15	5.87	1.91	5.71	172	195	29.9	16.8	6.65	83	1	3	15507581325
2023.08.08	1	32	32	1	5	11	0	1	4	25.61	12	15.5	15.4	2.56	45.8	4.79	2.75	1.59	5.9	181	300	44.1	20.2	5.45	50	1	3	15209743336
2023.07.24	1	59	59	1	3	11	0	1	4	23.51	8.7	10.3	8.6	1.64	48.8	5.85	4.25	1.29	6.58	217	123	32.8	20.4	7.67	69	1	3	13897795019
2023.07.22	1	62	62	2	3	11	0	1	3	23.53	10.4	17.3	13.1	2.45	37	7.48	6.31	0.75	5.52	162	134	26.4	27.4	7.24	146	1	3	15897268009
2023.1.03	1	64	64	4	3	11	0	1	0.6	26.9	10.05	19.19	8	1.72	41.5	4.94	3.62	1.06	5.48	170	101	26.3	15.1	5.58	79	1	1	13369740005
2023.1.04	1	46	46	2	1	11	0	1	0.6	30	10.48	16.48	10.9	1.99	44.2	4.73	3.31	0.97	4.95	165	92	72.6	39.6	5.88	60	1	3	13909745656
2023.02.02	2	42	42	1	3	11	0	1	1	22.7	15.35	28.7	16.4	3.29	21.7	4.73	3.31	1.32	4.95	165	139	21.7	19.6	6.79	50	0	2	15897040916
2023.02.03	2	56	56	2	3	11	0	1	5	29.5	11.3	16.7	12.4	2.38	38	4.01	2.04	1.68	5.61	158	251	27.4	9.6	5.48	47	1	1	17797384751
2023.02.06	1	54	54	1	3	11	0	1	0.6	28.41	8.5	10.5	10.4	2.12	45.1	5.71	4.05	1.28	5.3	177	165	30.7	12	12.43	54	1	1	18997340597
2023.02.14	1	64	64	2	2	11	0	1	15	21.7	10.5	25.05	14.6	4.26	44	4.98	3.29	1.25	6.31	145	122	45.7	26.9	8.31	78	1	3	18109748833
2023.02.15	1	56	56	2	3	11	0	1	15	28	11.4	13.7	14	2.26	35.1	5.16	3.51	1.28	3.88	129	106	17.5	12.2	7.88	78	1	3	15597660259
2023.03.06	1	52	52	2	4	11	0	1	6	27.7	10.86	14.5	10.3	1.99	40.3	6.42	3.67	2.29	5.37	173	200	127.9	44.3	5.35	62	1	1	13897543111
2023.03.15	1	61	61	1	3	11	0	1	5	28.1	14.96	20.7	12.8	2.21	40.1	5.54	3.96	1.29	5.03	164	189	39.2	21.7	6.43	88	1	3	13139140232
2023.03.29	1	67	67	2	2	11	0	1	12	32.1	11.3	15.78	10.7	1.92	42	7.02	4.95	1.45	6.08	192	98	21.3	11.7	5.59	68	1	3	15897266889
2023.04.04	1	42	42	2	2	11	0	1	10	28.5	11.4	15.69	13.8	2.24	40.3	6.63	3.64	2.44	5.41	161	217	25.5	15.7	6.34	54	1	3	13997440546
2023.04.08	1	60	60	2	3	11	0	1	3	25.7	9.27	10.3	14.5	2.15	29.8	6.09	3.92	1.52	4.23	138	191	70.7	40	7.19	61	1	3	13897348810
2023.04.13	1	60	60	4	3	11	0	1	0.1	26.4	6.51	12.4	13.4	2.16	40.4	8.47	6.38	1.43	6.55	209	105	109.4	38.5	7.99	76	0	1	15897156232
2023.04.17	1	49	49	2	4	11	0	1	0.3	26.2	10.7	14.2	10.5	1.72	41.5	10.33	7.67	1.98	5.64	163	282	35.8	16.3	8.85	100	1	3	15909748880
2023.05.19	1	46	46	2	3	11	0	1	3	23	11.3	15.4	15	2.93	40.1	8.76	6.51	1.45	5.63	168	218	14.5	8.3	7.88	76	0	2	15352942584
2023.05.19	1	59	59	1	1	11	0	1	6	29	9.7	11.79	7	1.59	41.3	4.97	3.23	1.31	5.02	170	212	62.7	31.1	3.35	68	1	1	13119740468
2023.06.29	2	59	59	2	3	11	0	1	1	30.9	11.5	13.4	12.7	3.19	38.6	5.49	3.3	1.79	5.08	160	182	43	21.2	5.2	61	1	1	17697050992
2023.06.08	2	55	55	4	3	11	0	1	4	26.56	10.73	15.98	14.5	2.71	44.3	5.07	3.57	1.85	5.31	166	118	40.3	18	6.11	53	1	1	17716031673
2023.07.13	1	60	60	2	2	11	0	1	10	20.44	9.6	11.78	8.3	2.09	44	6.74	3.22	3.06	5.31	165	307	19.5	15.3	6.12	69	1	3	13086236939
2023.07.17	1	54	54	1	3	11	0	1	0.6	29.27	11.8	16.92	15.1	2.88	47.7	8.63	5.95	2.11	6.13	185	156	15	11.6	9.18	64	1	3	15997045566
2023.07.20	1	64	64	2	2	11	0	1	16	24.89	7.4	9.26	8.6	1.54	40.2	8.65	5.79	2.3	5.85	180	187	29.7	15.1	9.8	80	1	3	18197383888
2023.07.22	2	61	61	1	3	11	0	1	3	21.3	5.6	6.4	5.1	2.03	37.8	3.1	1.97	1.85	3.54	128	37	74	81	3.67	46	1	2	13897140847
2023.07.25	1	59	59	2	2	11	0	1	15	29.4	4.5	6.1	5.2	1.38	45.1	6.15	4.42	1.34	5.42	167	215	25.8	10.9	6.05	91	1	3	13897348616
2023.07.28	1	65	65	2	3	11	0	1	6	24.8	17.8	21.25	12.8	2.2	38.7	8	5.42	2.25	4.9	154	131	29.3	11.2	6.27	65	1	1	18997340075
2023.07.30	1	55	55	4	3	11	0	1	1	27.7	11.7	16.2	11.7	2.51	46.5	4.61	2.49	1.75	5.19	182	199	40.6	15.8	5.33	65	1	3	13734343754
2023.08.01	1	66	66	2	2	11	0	1	15	21.45	5.28	8.1	7.9	1.65	46.9	5.81	3.65	1.56	6.02	182	266	14.8	14.7	5.65	52	1	3	18009748788
2023.08.05	1	67	67	1	2	11	0	1	20	18.95	5.4	7.89	4.6	2.12	33.3	5.75	3.75	1.54	4.78	156	148	20.3	18	4.12	79	1	2	18297040788
2023.08.14	1	55	55	2	1	11	0	1	6	27.8	10.7	13.5	8.7	1.68	42.1	8.22	6.02	1.55	5.57	166	256	26.9	11.5	4.81	67	1	3	13897793416
2023.08.16	1	46	46	2	4	11	0	1	0.3	27.2	13.5	18.24	15	2.16	38.1	4.18	2.93	0.98	5.1	158	176	32.1	14	6.07	68	1	1	15809748766
2023.08.20	1	67	67	2	3	11	0	1	6	20.56	7.4	8.3	8.5	1.7	45.3	6.37	3.57	2.08	4.78	159	155	20	23	6.64	80	1	2	15509746456
2023.08.25	1	66	66	2	2	11	0	1	20	32.17	5.3	6.84	7.9	2.77	45.8	6.71	3.94	1.92	5.14	160	193	58.6	28.7	7.7	58	1	3	13897343288
2023.08.28	1	65	65	1	3	11	0	1	0.1	26.95	26.71	10.8	18.2	3	34.6	5.46	3.67	1.36	7.95	194	211	46.2	38.9	7.61	90	1	1	15897256924
2023.08.30	1	47	47	2	1	11	0	1	5	23.37	13.4	16.55	14.7	2.66	43.3	4.32	2.73	1.27	5.31	171	141	19.2	12	4.61	55	1	3	15809740569
2023.09.01	1	58	58	2	3	11	0	1	4	26.95	17.8	25.62	11.7	2.47	37.7	9.79	6.79	2.5	5	167	193	29.8	20.4	6.55	84	1	3	13734648992
2023.09.05	1	62	62	2	3	11	0	1	13	30.8	9.7	12.66	12.7	2.54	40.3	6.41	4.84	1.27	7.6	220	158	45.8	20.8	11.87	111	1	3	13139149215
2023.09.09	1	60	60	1	3	11	0	1	0.1	25.14	8.7	16.2	11.5	2.19	40.3	6.03	4	1.61	7.42	222	163	25.3	14.6	5.52	89	1	1	13734648992
2023.09.11	1	59	59	1	2	11	0	1	9	25.31	11.4	16.5	8.7	2.35	47.4	6.29	4.59	1.16	5.27	166	130	52.7	40.1	8.75	69	1	2	15997348928
2023.09.16	1	51	51	2	2	11	0	1	6	23.2	9.8	11.78	9.6	1.83	40.5	14.47	12.67	1.18	4.05	127	211	43	27	4.44	55	1	2	13139147777
2023.09.18	1	57	57	2	2	11	0	1	5	33.43	7.8	10.4	10.8	2.3	43.7	4.35	2.87	1.09	5.45	172	196	58.5	26.4	5.39	58	1	1	15597663311
2023.10.12	2	57	57	2	3	11	0	1	10	26.4	7.7	10.4	7	1.5	36.3	4.95	2.88	1.74	4.92	142	234	21	15.4	6.61	60	1	2	18195699949
2023.10.24	1	47	47	2	1	11	0	1	3	27.7	6.9	7.74	12.7	2.5	46.3	6.83	4.89	1.5	5.66	173	210	28.9	18.3	6.88	68	1	3	15897040800
2023.10.26	1	60	60	4	3	11	0	1	10	22.8	7.9	10.8	12.1	2.4	48.1	5.67	3.02	2.12	5.04	158	129	17.2	14.2	6.1	72	1	3	13897042978
2023.10.28	1	59	59	2	3	11	0	1	3	26.5	16.7	20.3	10.2	2.02	38.8	7.18	4.32	2.18	5.88	171	286	33.5	17.3	6.63	89	1	3	18197390332
2023.11.03	2	52	52	2	4	11	0	1	11	33.7	9.8	11.46	10.1	2.1	35.7	5.56	3.25	1.59	5.37	130	188	21.3	16.1	4.59	48	1	2	13139157306
2023.11.05	2	39	39	1	1	11	0	1	6	20.8	7.6	8.35	7.8	1.43	42	7.02	4.85	1.63	4.57	133	297	33	23.7	2.77	49	1	2	18097040660
2023.11.07	1	43	43	2	3	11	0	1	4	26.7	8.1	11.4	10.2	2.1	43.4	5.71	4.23	1.12	5.7	174	141	42.6	19.3	5.26	62	1	2	18297045062
2023.6.1	2	42	42	1	1	11	0	1	3	27.68	7.2	11.2	5.78	1.7	40	5.84	3.54	1.89	5.31	156	222	15.9	11.2	4.6	54	1	1	13897214141
2023.6.1	2	65	65	1	2	11	0	1	0.5	25.5	9.07	13.2	6.44	2.5	43	5.64	3.83	1.33	4.65	141	206	20.7	13.8	3.9	53	1	1	18633666780
2023.6.2	2	52	52	1	2	11	0	1	2	24.8	12.21	11.4	12.08	2.7	42	5.07	3.24	1.59	5.64	162	159	28.2	15.3	5	50	1	2	13209717731
2023.6.2	2	62	62	1	2	11	0	1	6	23.24	8.33	12.1	6.88	2.3	42	4.27	2.09	1.89	4.47	140	122	149.6	81.4	6.3	62	1	1	17797087234
2023.6.5	1	60	60	1	2	11	0	1	0.5	21.96	8.09	13.1	4.65	1.6	41	3.4	2.19	0.93	4.82	159	97	38.1	25.9	7.9	93	1	1	13997196882
2023.6.6	2	72	72	1	2	11	0	1	5	21.27	10.63	15.5	8.22	3.3	46	4.87	2.92	1.54	4.85	143	134	13.9	18.8	4.2	50	1	2	13519703682
2023.6.7	2	60	60	1	2	11	0	1	0.1	20.83	14.33	14.44	9.86	2.5	45	6.73	4	2.38	5.11	147	139	86.1	44.9	6.4	48	1	2	13897204491
2023.6.7	2	74	74	1	2	11	0	1	15	20.8	7.67	9.7	6.47	2.8	41	4.42	1.99	2.09	4.99	150	149	41.4	33.1	6.6	65	1	2	13997216318
2023.6.7	1	32	32	1	2	11	0	1	0.17	21.5	8.71	10.6	9.43	3.4	40	7.41	4.51	2.47	5.32	171	217	18.4	15.9	4.4	74	1	1	13897669951
2023.6.8	2	61	61	1	2	11	0	1	0.2	22.66	5.92	9	5.9	1.2	42	4.26	2.88	1.11	3.88	131	100	16.7	20.2	3.68	65	1	1	18709745165
2023.6.8	2	43	43	1	6	11	0	1	3	27.3	8.22	12.4	6.93	2.5	44	6.54	3.45	2.43	4.49	130	300	40.4	20.4	3.2	48	1	2	13139091898
2023.6.9	1	45	45	1	3	11	0	1	3	27.5	6.56	11.6	5.05	1.5	44	5.57	3.4	1.83	5.95	179	131	19.1	16.6	3.7	70	1	1	13997332279
2023.6.12	1	60	60	1	1	11	0	1	0.2	25.8	14.26	15.5	9.26	3.6	42	9.18	6.36	2.27	4.82	143	222	34.8	20.8	8.3	72	1	2	13007769009
2023.6.12	1	82	82	1	1	11	0	1	7	27.17	8.29	11.4	9.03	2.6	47	3.8	2.31	1.08	4.79	152	142	18.3	16	3.8	73	1	2	18097225507
2023.6.12	1	52	52	1	1	11	0	1	7	22.7	18.31	16.7	9.32	2.5	43	7.87	4.28	2.78	6.07	184	268	34.4	19.9	5.7	75	1	1	13793901358
2023.6.12	1	62	62	1	2	11	0	1	12	20.51	10.78	14.3	8.71	2.9	44	5.53	4.13	0.94	4.18	141	130	16.8	18.3	3	67	1	1	17797221286
2023.6.14	2	54	54	1	2	11	0	1	1	23.42	8.8	13.9	6.59	2.4	40	5.34	2.68	2.17	4.31	131	217	50.4	29.2	2.8	61	1	1	15609782860
2023.6.14	2	55	55	1	2	11	0	1	8	30.7	12.4	14.4	8.12	2.2	41	5.79	3.45	1.89	4.37	138	208	22.6	15.5	4.5	45	1	1	18097267998
